# Supplementary material
Source: PubMed Central journal article supplement (PMC5808442)

## Supplementary Discussion

There is an extensive history demonstrating that iron-sulfur clusters (ISCs) are particularly sensitive to O<sub>2</sub> [1]. Approximately 3 billion years ago when the concentration of O<sub>2</sub> in the Earth's atmosphere was minimal [2], one of the most important reactions for all future life on Earth was the fixation of N<sub>2</sub> to NH<sub>3</sub> or other molecules, a reaction carried out by the enzyme nitrogenase [3]. A key feature of nitrogenase is that it contains ISCs required for its function. Indeed, NFS1 (homolog of Nitrogen-Fixing bacteria S) was named for the role of NFS1 homologs in supporting nitrogen fixation [4]. Nitrogenase activity is highly sensitive to the concentration of O<sub>2</sub> [3, 5]. Therefore when the earth's atmosphere underwent an increase in O<sub>2</sub> concentration approximately 2.5 billion years ago, microbial life likely evolved mechanisms to protect the nitrogenase from damage [2]. This phenomenon can be observed in cyanobacteria, where the nitrogenase reaction is carried out largely in heterocysts [6, 7], specialized structures that exclude O<sub>2</sub> [5, 8].

Another interesting system which demonstrates the sensitivity of ISCs to O<sub>2</sub> is the *E. coli* enzyme fumarate and nitrate reductase (FNR). FNR acts as a physiologic O<sub>2</sub> sensor with an ISC switch: in hypoxic conditions FNR contains an ISC, permitting nucleic acid binding and the transcriptional activation or repression of hundreds of oxygen responsive genes, analogous to the mammalian HIFs (reviewed in [9]). Importantly, in a high oxygen environment, the FNR ISC directly interacts with O<sub>2</sub>, resulting in cluster degradation [10]. These experiments, and others, have led scientists to conclude that the FNR cluster degrades according to the following chemical equation [9]:

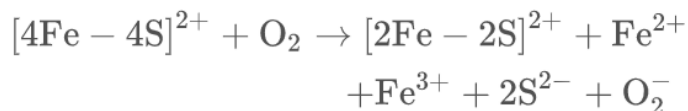

Moreover, ISCs are well-established to be oxidized by O<sub>2</sub> *in vitro* and *in vivo*. Biophysical methods such as EPR, UV, and circular dichroism spectroscopy on isolated proteins have been used to demonstrate that O<sub>2</sub> can degrade ISCs [9, 11, 12]. Despite these important examples, one can still imagine a scenario by which O<sub>2</sub> is converted to another reactive oxygen species which then leads to cluster degradation. While the antioxidant defenses of the cell severely curtail the presence of H<sub>2</sub>O<sub>2</sub> and O<sub>2</sub><sup>-</sup>, several studies also directly address the differential ability of O<sub>2</sub> and other reactive oxygen species to degrade ISCs. Quoting from [1]:

Importantly, [the enzyme] PFOR is more easily oxidized by oxygen than by superoxide [13], in marked contrast to the [4Fe-4S] dehydratases. Hydrogen peroxide and superoxide oxidize metals by inner-sphere mechanisms [14], which require that the oxidant directly bind the cluster in order to receive electrons from it. In contrast, it is likely that electrons can hop from the slightly buried PFOR cluster to nearby molecular oxygen, as they normally do to the cluster of ferredoxin. In this way molecular oxygen may oxidize a fully coordinated cluster, while H<sub>2</sub>O<sub>2</sub> and O<sub>2</sub><sup>-</sup> cannot.

A similar sentiment is expressed by a different set of authors in [15]:

Redox active Fe-S clusters, like in ferredoxin, do not need to keep the fourth position open for ligation with substrates or cofactors. Ferredoxins may have four buried protein ligands and be protected by the protein matrix. Consequently, ROS will not react the same way, or at all, with each type of Fe<sub>4</sub>S<sub>4</sub> cluster. It has been proposed that buried Fe<sub>4</sub>S<sub>4</sub> clusters with four protein

ligands are less sensitive to oxidation by superoxide and hydrogen peroxide. Nevertheless they can still be oxidized by molecular oxygen, most probably via outer-sphere transfer...

Therefore, for ISCs coordinated by four cysteines,  $O_2$  may be the only oxygen species capable of easily oxidizing the cluster. Indeed, of the top ten ISC proteins rated most essential by high throughput screens (Extended Data Figure 5b), nine are coordinated by four cysteine ligands based on UniProt annotations. Thus, the most essential ISC proteins are of the class described above which are predicted to be relatively resistant to oxidation by  $H_2O_2$  and  $O_2^-$ . Reactive oxygen species can have a role in degrading iron-sulfur clusters, particularly *in vitro*. However, cellular antioxidant defenses largely neutralize these highly reactive species, while permitting  $O_2$  access to important cellular enzymes requiring it as a substrate. Indeed, we observed that culture of cells in 21% oxygen decreases aconitase activity, but treatment of tbHP does not (Figure 3f); and culture of cells in 21% oxygen increases TFRC expression, but treatment of tbHP does not (Figure 3h). These same tbHP conditions increase cellular ROS, whereas these same  $O_2$  conditions do not increase cellular ROS, as measured by ROS active dyes (Figure 3g). These observations are consistent with  $O_2$  playing a greater role than other ROS in degrading ISCs in cells with an intact antioxidant defense.

Several studies have demonstrated that cancer cells alter cellular iron concentrations via regulation of iron uptake, storage and efflux pathways [16-18]. For example, cirrhotic patients with primary hemochromatosis, an iron overload disorder, exhibit a higher occurrence of hepatic cancer [19], and correlation between iron overload and with other cancer types has been suggested [20, 21]. Given its possible role in tumorigenesis, iron depletion has been proposed as a potential therapeutic approach for cancer in preclinical studies. However, clinical trials utilizing iron chelators such as DFO showed only mixed results [22, 23].

Although several studies suggest a link between cancer and iron [24], less is known about how tumors utilize iron to support neoplastic growth. Several investigators have proposed that iron could be neoplastic via upregulating the activity of iron-dependent enzymes. Excess iron could also contribute to tumor initiation via iron-dependent ROS production [25]. Indeed, alteration of genes involved in iron metabolism can affect ROS levels [26], and disruption of iron metabolism can induce sensitivity to chemotherapeutic agents [27].

Alternatively, studies have attempted to increase intracellular free iron to induce cellular toxicity. Ascorbate, a potent reducing agent, increases available cellular iron by releasing insoluble  $Fe^{3+}$  from the iron storage protein ferritin reducing it to  $Fe^{2+}$ , thereby increasing susceptibility to ROS-producing agents specifically in cancer cell lines expressing high levels of ferritin [28-30]. Therefore, oral administration of ascorbate has been tested in clinical trials, but this treatment failed to prevent cancer growth due to poor absorption and transport [31, 32]. In contrast, intravenous ascorbate injections have enhanced chemosensitivity in some cancers, renewing interest in the potential of ascorbate treatment, although targeting iron metabolism is not cited as the rationale for current applications [33-35]. The synergistic effect of high cellular iron to induce ROS is also exploited by targeting cancer cells with iron-containing micelles with promising pre-clinical results [36-38]. However, targeting the iron starvation response to predispose tumors to oxidative damage has not been previously proposed. Activation of the iron starvation response is expected to increase cellular labile iron levels by both increasing iron import via the transferrin receptor while releasing iron from intracellular stores via ferritinophagy and decreased ferritin expression. Therefore, altering iron metabolism to enhance existing ROS sensitivity presents an unexplored therapeutic potential to target cancer cells.

We propose that elevated oxygen level exerts a selective metabolic pressure on incipient lung adenocarcinomas. While prior work demonstrates that tumour hypoxia selects for cells that are more migratory and metabolically adapted [39], available evidence points to the strong influence of hyperoxia on normal cell biology and tissue physiology. *In vitro* oxygen levels increase DNA damage and impact the time to senescence [40], and in ischemia/reperfusion injury tissue reoxygenation induces damage via reactive oxygen species [41, 42]. The lung exists in an oxygen-rich environment requiring a heightened control of redox balance and oxidative damage [43]. Defective anti-oxidant or redox management has been linked to pulmonary fibrosis [44, 45], and oxidative damage is exacerbated in cystic fibrosis [46], as pulmonary mucus protects lung epithelium from oxidative damage [47, 48]. Interestingly, low elevation correlates significantly with the development of neoplasms in the lung, but not other tissues, an observation attributed to higher atmospheric oxygen levels driving tumourigenesis [49]. Indeed, pathways that support the anti-oxidant response, such as NRF2/KEAP1, are frequently altered in lung cancer [50].

The ISC biosynthetic enzyme NFS1 is an exemplar of a gene whose cellular requirement is impacted by environmental oxygen level. *NFS1* lies in a region of genomic amplification under positive selection in lung adenocarcinoma. This amplification is required for anchorage independent growth and optimal growth in atmospheric oxygen conditions. Our data support the notion that high oxidative stress present in the lung renders acquisition of a robust anti-oxidant defense a key alteration in lung tumourigenesis, and are consistent with the hypothesis that robust NFS1 expression supports the early phases of lung adenocarcinoma development. By increasing NFS1 levels, lung tumour cells protect ISCs, cofactors that are particularly sensitive to molecular oxygen and are required for several cell-essential enzymes. Moreover, ISCs trigger the iron starvation response when damaged, increasing the free iron pool. Intracellular iron level has been linked to the propensity for exogenous oxidants to damage cells and tissues [51], resulting in ferroptosis due to oxidative damage to polyunsaturated fatty acids [52-54]. However, because *in vivo* ferroptosis markers have not been identified, we are unable to determine whether ferroptosis occurs in human tumours or xenograft models.

## References

1. Imlay JA. Iron-sulphur clusters and the problem with oxygen. *Molecular microbiology*. 2006;59(4):1073-82.
2. Canfield DE. Oxygen : a four billion year history.
3. Eady RR, Postgate JR. Nitrogenase. *Nature*. 1974;249(460):805-10.
4. Zheng L, White RH, Cash VL, Jack RF, Dean DR. Cysteine desulfurase activity indicates a role for NIFS in metallocluster biosynthesis. *Proceedings of the National Academy of Sciences of the United States of America*. 1993;90(7):2754-8. PMID: 46174.
5. Stewart WD. Nitrogen fixation by photosynthetic microorganisms. *Annu Rev Microbiol*. 1973;27:283-316.
6. Fleming H, Haselkorn R. Differentiation in *Nostoc muscorum*: nitrogenase is synthesized in heterocysts. *Proceedings of the National Academy of Sciences of the United States of America*. 1973;70(10):2727-31. PMID: 427096.
7. Stewart WD, Haystead A, Pearson HW. Nitrogenase activity in heterocysts of blue-green algae. *Nature*. 1969;224(5216):226-8.
8. Haury JF, Wolk CP. Classes of *Anabaena variabilis* mutants with oxygen-sensitive nitrogenase activity. *Journal of bacteriology*. 1978;136(2):688-92. PMID: 218594.
9. Crack JC, Le Brun NE, Thomson AJ, Green J, Jervis AJ. Reactions of nitric oxide and oxygen with the regulator of fumarate and nitrate reduction, a global transcriptional regulator, during anaerobic growth of *Escherichia coli*. *Methods in enzymology*. 2008;437:191-209.

10. Jordan PA, Thomson AJ, Ralph ET, Guest JR, Green J. FNR is a direct oxygen sensor having a biphasic response curve. *FEBS letters*. 1997;416(3):349-52.
11. Jakimowicz P, Cheesman MR, Bishai WR, Chater KF, Thomson AJ, Buttner MJ. Evidence that the *Streptomyces* developmental protein WhiD, a member of the WhiB family, binds a [4Fe-4S] cluster. *The Journal of biological chemistry*. 2005;280(9):8309-15.
12. Crack J, Green J, Thomson AJ. Mechanism of oxygen sensing by the bacterial transcription factor fumarate-nitrate reduction (FNR). *The Journal of biological chemistry*. 2004;279(10):9278-86.
13. Pan N, Imlay JA. How does oxygen inhibit central metabolism in the obligate anaerobe *Bacteroides thetaiotaomicron*. *Molecular microbiology*. 2001;39(6):1562-71.
14. Goldstein S, Meyerstein D, Czapski G. The Fenton reagents. *Free radical biology & medicine*. 1993;15(4):435-45.
15. Rouault TA. Iron-sulfur clusters in chemistry and biology. 2. ed.
16. Stevens RG, Jones DY, Micozzi MS, Taylor PR. Body iron stores and the risk of cancer. *The New England journal of medicine*. 1988;319(16):1047-52.
17. Pinnix ZK, Miller LD, Wang W, D'Agostino R, Jr., Kute T, Willingham MC, Hatcher H, Tesfay L, Sui G, Di X, Torti SV, Torti FM. Ferroportin and iron regulation in breast cancer progression and prognosis. *Science translational medicine*. 2010;2(43):43ra56. PMID: 3734848.
18. Radulescu S, Brookes MJ, Salgueiro P, Ridgway RA, McGhee E, Anderson K, Ford SJ, Stones DH, Iqbal TH, Tselepis C, Sansom OJ. Luminal iron levels govern intestinal tumorigenesis after Apc loss in vivo. *Cell reports*. 2012;2(2):270-82.
19. Niederau C, Fischer R, Sonnenberg A, Stremmel W, Trampisch HJ, Strohmeyer G. Survival and causes of death in cirrhotic and in noncirrhotic patients with primary hemochromatosis. *The New England journal of medicine*. 1985;313(20):1256-62.
20. Hsing AW, McLaughlin JK, Olsen JH, Møller L, Wacholder S, Fraumeni JF, Jr. Cancer risk following primary hemochromatosis: a population-based cohort study in Denmark. *International journal of cancer Journal international du cancer*. 1995;60(2):160-2.
21. Tiniakos G, Williams R. Cirrhotic process, liver cell carcinoma and extrahepatic malignant tumors in idiopathic haemochromatosis. Study of 71 patients treated with venesection therapy. *Applied pathology*. 1988;6(2):128-38.
22. Yamasaki T, Terai S, Sakaida I. Deferoxamine for advanced hepatocellular carcinoma. *The New England journal of medicine*. 2011;365(6):576-8.
23. Donfrancesco A, Deb G, Dominici C, Pileggi D, Castello MA, Helson L. Effects of a single course of deferoxamine in neuroblastoma patients. *Cancer research*. 1990;50(16):4929-30.
24. Fonseca-Nunes A, Jakszyn P, Agudo A. Iron and cancer risk--a systematic review and meta-analysis of the epidemiological evidence. *Cancer epidemiology, biomarkers & prevention : a publication of the American Association for Cancer Research, cosponsored by the American Society of Preventive Oncology*. 2014;23(1):12-31.
25. Torti SV, Torti FM. Iron and cancer: more ore to be mined. *Nat Rev Cancer*. 2013;13(5):342-55. PMID: 4036554.
26. Pham CG, Bubici C, Zazzeroni F, Papa S, Jones J, Alvarez K, Jayawardena S, De Smaele E, Cong R, Beaumont C, Torti FM, Torti SV, Franzoso G. Ferritin heavy chain upregulation by NF-kappaB inhibits TNFalpha-induced apoptosis by suppressing reactive oxygen species. *Cell*. 2004;119(4):529-42.
27. Liu X, Madhankumar AB, Slagle-Webb B, Sheehan JM, Surguladze N, Connor JR. Heavy chain ferritin siRNA delivered by cationic liposomes increases sensitivity of cancer cells to chemotherapeutic agents. *Cancer research*. 2011;71(6):2240-9.
28. Baader SL, Bruchelt G, Carmine TC, Lode HN, Rieth AG, Niethammer D. Ascorbic-acid-mediated iron release from cellular ferritin and its relation to the formation of DNA strand breaks in neuroblastoma cells. *Journal of cancer research and clinical oncology*. 1994;120(7):415-21.
29. Bruchelt G, Schraufstatter IU, Niethammer D, Cochrane CG. Ascorbic acid enhances the effects of 6-hydroxydopamine and H2O2 on iron-dependent DNA strand breaks and related processes in the neuroblastoma cell line SK-N-SH. *Cancer research*. 1991;51(22):6066-72.

30. Buettner GR, Jurkiewicz BA. Catalytic metals, ascorbate and free radicals: combinations to avoid. *Radiation research*. 1996;145(5):532-41.
31. Creagan ET, Moertel CG, O'Fallon JR, Schutt AJ, O'Connell MJ, Rubin J, Frytak S. Failure of high-dose vitamin C (ascorbic acid) therapy to benefit patients with advanced cancer. A controlled trial. *The New England journal of medicine*. 1979;301(13):687-90.
32. Moertel CG, Fleming TR, Creagan ET, Rubin J, O'Connell MJ, Ames MM. High-dose vitamin C versus placebo in the treatment of patients with advanced cancer who have had no prior chemotherapy. A randomized double-blind comparison. *The New England journal of medicine*. 1985;312(3):137-41.
33. Ma Y, Chapman J, Levine M, Polireddy K, Drisko J, Chen Q. High-dose parenteral ascorbate enhanced chemosensitivity of ovarian cancer and reduced toxicity of chemotherapy. *Science translational medicine*. 2014;6(222):222ra18.
34. Chen Q, Espey MG, Sun AY, Pooput C, Kirk KL, Krishna MC, Khosh DB, Drisko J, Levine M. Pharmacologic doses of ascorbate act as a prooxidant and decrease growth of aggressive tumor xenografts in mice. *Proceedings of the National Academy of Sciences of the United States of America*. 2008;105(32):11105-9. PMID: 2516281.
35. Yun J, Mullarky E, Lu C, Bosch KN, Kavalier A, Rivera K, Roper J, Chio, II, Giannopoulou EG, Rago C, Muley A, Asara JM, Paik J, Elemento O, Chen Z, Pappin DJ, Dow LE, Papadopoulos N, Gross SS, Cantley LC. Vitamin C selectively kills KRAS and BRAF mutant colorectal cancer cells by targeting GAPDH. *Science*. 2015;350(6266):1391-6. PMID: 4778961.
36. Franke JC, Plotz M, Prokop A, Geilen CC, Schmalz HG, Eberle J. New caspase-independent but ROS-dependent apoptosis pathways are targeted in melanoma cells by an iron-containing cytosine analogue. *Biochemical pharmacology*. 2010;79(4):575-86.
37. Huang G, Chen H, Dong Y, Luo X, Yu H, Moore Z, Bey EA, Boothman DA, Gao J. Superparamagnetic iron oxide nanoparticles: amplifying ROS stress to improve anticancer drug efficacy. *Theranostics*. 2013;3(2):116-26. PMID: 3575592.
38. Kwon B, Han E, Yang W, Cho W, Yoo W, Hwang J, Kwon BM, Lee D. Nano-Fenton Reactors as a New Class of Oxidative Stress Amplifying Anticancer Therapeutic Agents. *ACS applied materials & interfaces*. 2016;8(9):5887-97.
39. Pennacchietti S, Michieli P, Galluzzo M, Mazzone M, Giordano S, Comoglio PM. Hypoxia promotes invasive growth by transcriptional activation of the met protooncogene. *Cancer cell*. 2003;3(4):347-61.
40. Parrinello S, Samper E, Krtolica A, Goldstein J, Melov S, Campisi J. Oxygen sensitivity severely limits the replicative lifespan of murine fibroblasts. *Nature cell biology*. 2003;5(8):741-7.
41. Peters O, Back T, Lindauer U, Busch C, Megow D, Dreier J, Dirnagl U. Increased formation of reactive oxygen species after permanent and reversible middle cerebral artery occlusion in the rat. *Journal of cerebral blood flow and metabolism : official journal of the International Society of Cerebral Blood Flow and Metabolism*. 1998;18(2):196-205.
42. Kevin LG, Camara AK, Riess ML, Novalija E, Stowe DF. Ischemic preconditioning alters real-time measure of O<sub>2</sub> radicals in intact hearts with ischemia and reperfusion. *American journal of physiology Heart and circulatory physiology*. 2003;284(2):H566-74.
43. Heffner JE, Repine JE. Pulmonary strategies of antioxidant defense. *The American review of respiratory disease*. 1989;140(2):531-54.
44. Demedts M, Behr J, Buhl R, Costabel U, Dekhuijzen R, Jansen HM, MacNee W, Thomeer M, Wallaert B, Laurent F, Nicholson AG, Verbeken EK, Verschakelen J, Flower CD, Capron F, Petruzzelli S, De Vuyst P, van den Bosch JM, Rodriguez-Becerra E, Corvasce G, Lankhorst I, Sardina M, Montanari M, Group IS. High-dose acetylcysteine in idiopathic pulmonary fibrosis. *The New England journal of medicine*. 2005;353(21):2229-42.
45. Cho HY, Reddy SP, Yamamoto M, Kleeberger SR. The transcription factor NRF2 protects against pulmonary fibrosis. *Faseb J*. 2004;18(11):1258-60.

46. Galli F, Battistoni A, Gambari R, Pompella A, Bragonzi A, Pilolli F, Iuliano L, Piroddi M, Dehecchi MC, Cabrini G, Working Group on Inflammation in Cystic F. Oxidative stress and antioxidant therapy in cystic fibrosis. *Biochimica et biophysica acta*. 2012;1822(5):690-713.
47. Cross CE, Halliwell B, Allen A. Antioxidant protection: a function of tracheobronchial and gastrointestinal mucus. *Lancet*. 1984;1(8390):1328-30.
48. Lillehoj ER, Kim KC. Airway mucus: its components and function. *Archives of pharmacal research*. 2002;25(6):770-80.
49. Simeonov KP, Himmelstein DS. Lung cancer incidence decreases with elevation: evidence for oxygen as an inhaled carcinogen. *PeerJ*. 2015;3:e705. PMCID: 4304851.
50. Singh A, Misra V, Thimmulappa RK, Lee H, Ames S, Hoque MO, Herman JG, Baylin SB, Sidransky D, Gabrielson E, Brock MV, Biswal S. Dysfunctional KEAP1-NRF2 interaction in non-small-cell lung cancer. *PLoS medicine*. 2006;3(10):e420. PMCID: 1584412.
51. Minotti G, Aust SD. The role of iron in oxygen radical mediated lipid peroxidation. *Chemico-biological interactions*. 1989;71(1):1-19.
52. Dixon SJ, Lemberg KM, Lamprecht MR, Skouta R, Zaitsev EM, Gleason CE, Patel DN, Bauer AJ, Cantley AM, Yang WS, Morrison B, 3rd, Stockwell BR. Ferroptosis: an iron-dependent form of nonapoptotic cell death. *Cell*. 2012;149(5):1060-72. PMCID: 3367386.
53. Jiang L, Kon N, Li T, Wang SJ, Su T, Hibshoosh H, Baer R, Gu W. Ferroptosis as a p53-mediated activity during tumour suppression. *Nature*. 2015;520(7545):57-62. PMCID: 4455927.
54. Yang WS, Kim KJ, Gaschler MM, Patel M, Shchepinov MS, Stockwell BR. Peroxidation of polyunsaturated fatty acids by lipoxygenases drives ferroptosis. *Proceedings of the National Academy of Sciences of the United States of America*. 2016;113(34):E4966-75. PMCID: 5003261.

Figure 1F

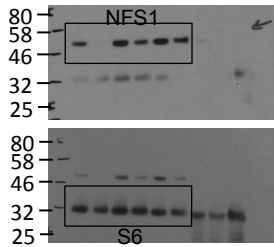

Figure 2D

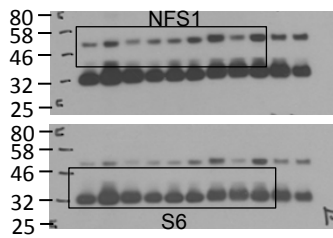

Figure 2E

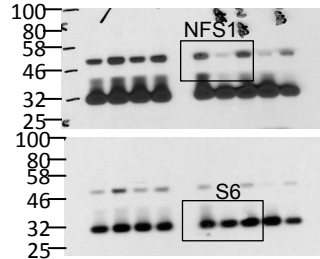

Figure 2H

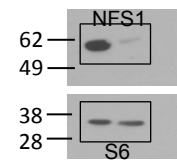

Figure 3C

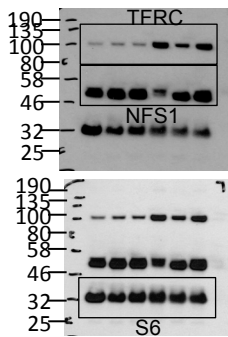

Figure 3H

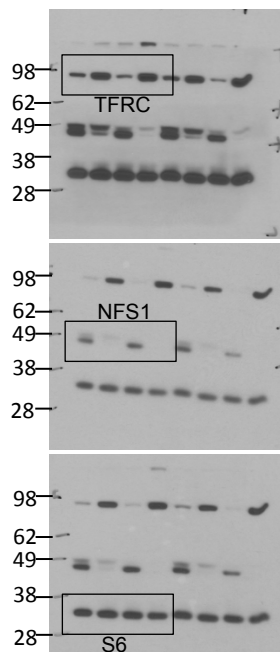

Ext Data Figure 2C, 5A

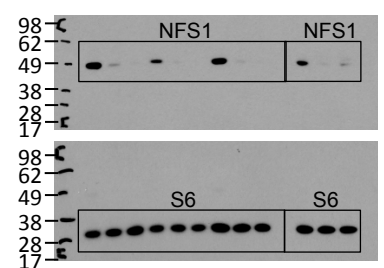

Ext Data Figure 3G

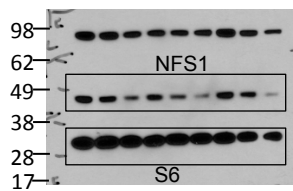

Ext Data Figure 4E

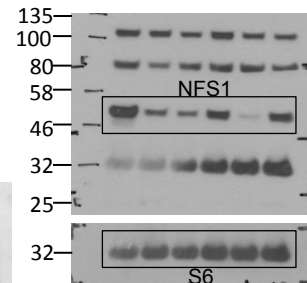

Ext Data Figure 5E

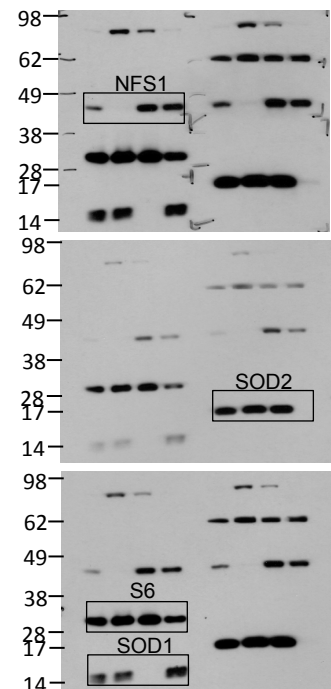

Ext Data Figure 2D

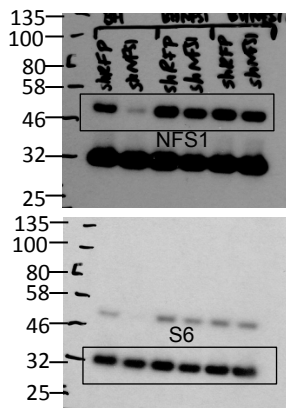

Ext Data Figure 5G

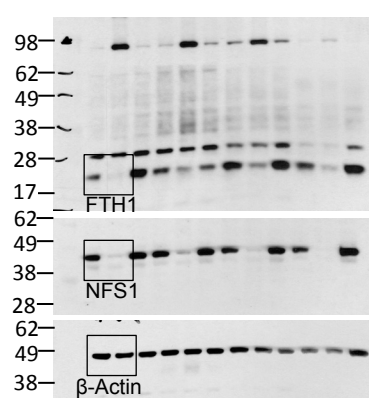

Ext Data Figure 6C

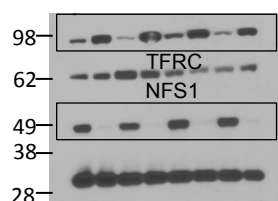

Rev 2:Figure  
1E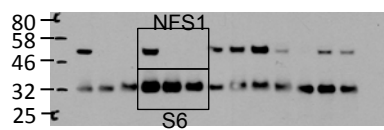

Select Live Cell Population → Select Single Cell Population → Select ROS+ Population

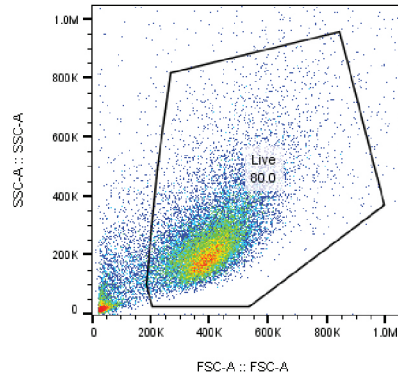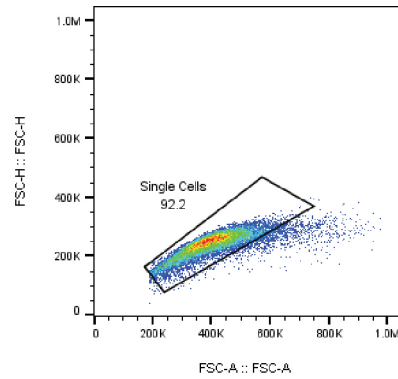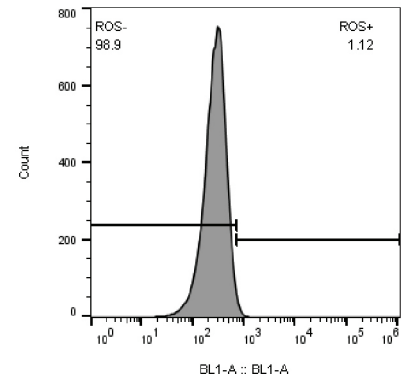

Supplement: NIHMS937625-supplement-Supplementary_Information.pdf [file NIHMS937625-supplement-Supplementary_Information.pdf]
